# Supplementary material
Source: PubMed Central journal article supplement (PMC3419781)
Supplement: NIHMS380321-supplement-Supp_Figure_S1.pdf [file NIHMS380321-supplement-Supp_Figure_S1.pdf]

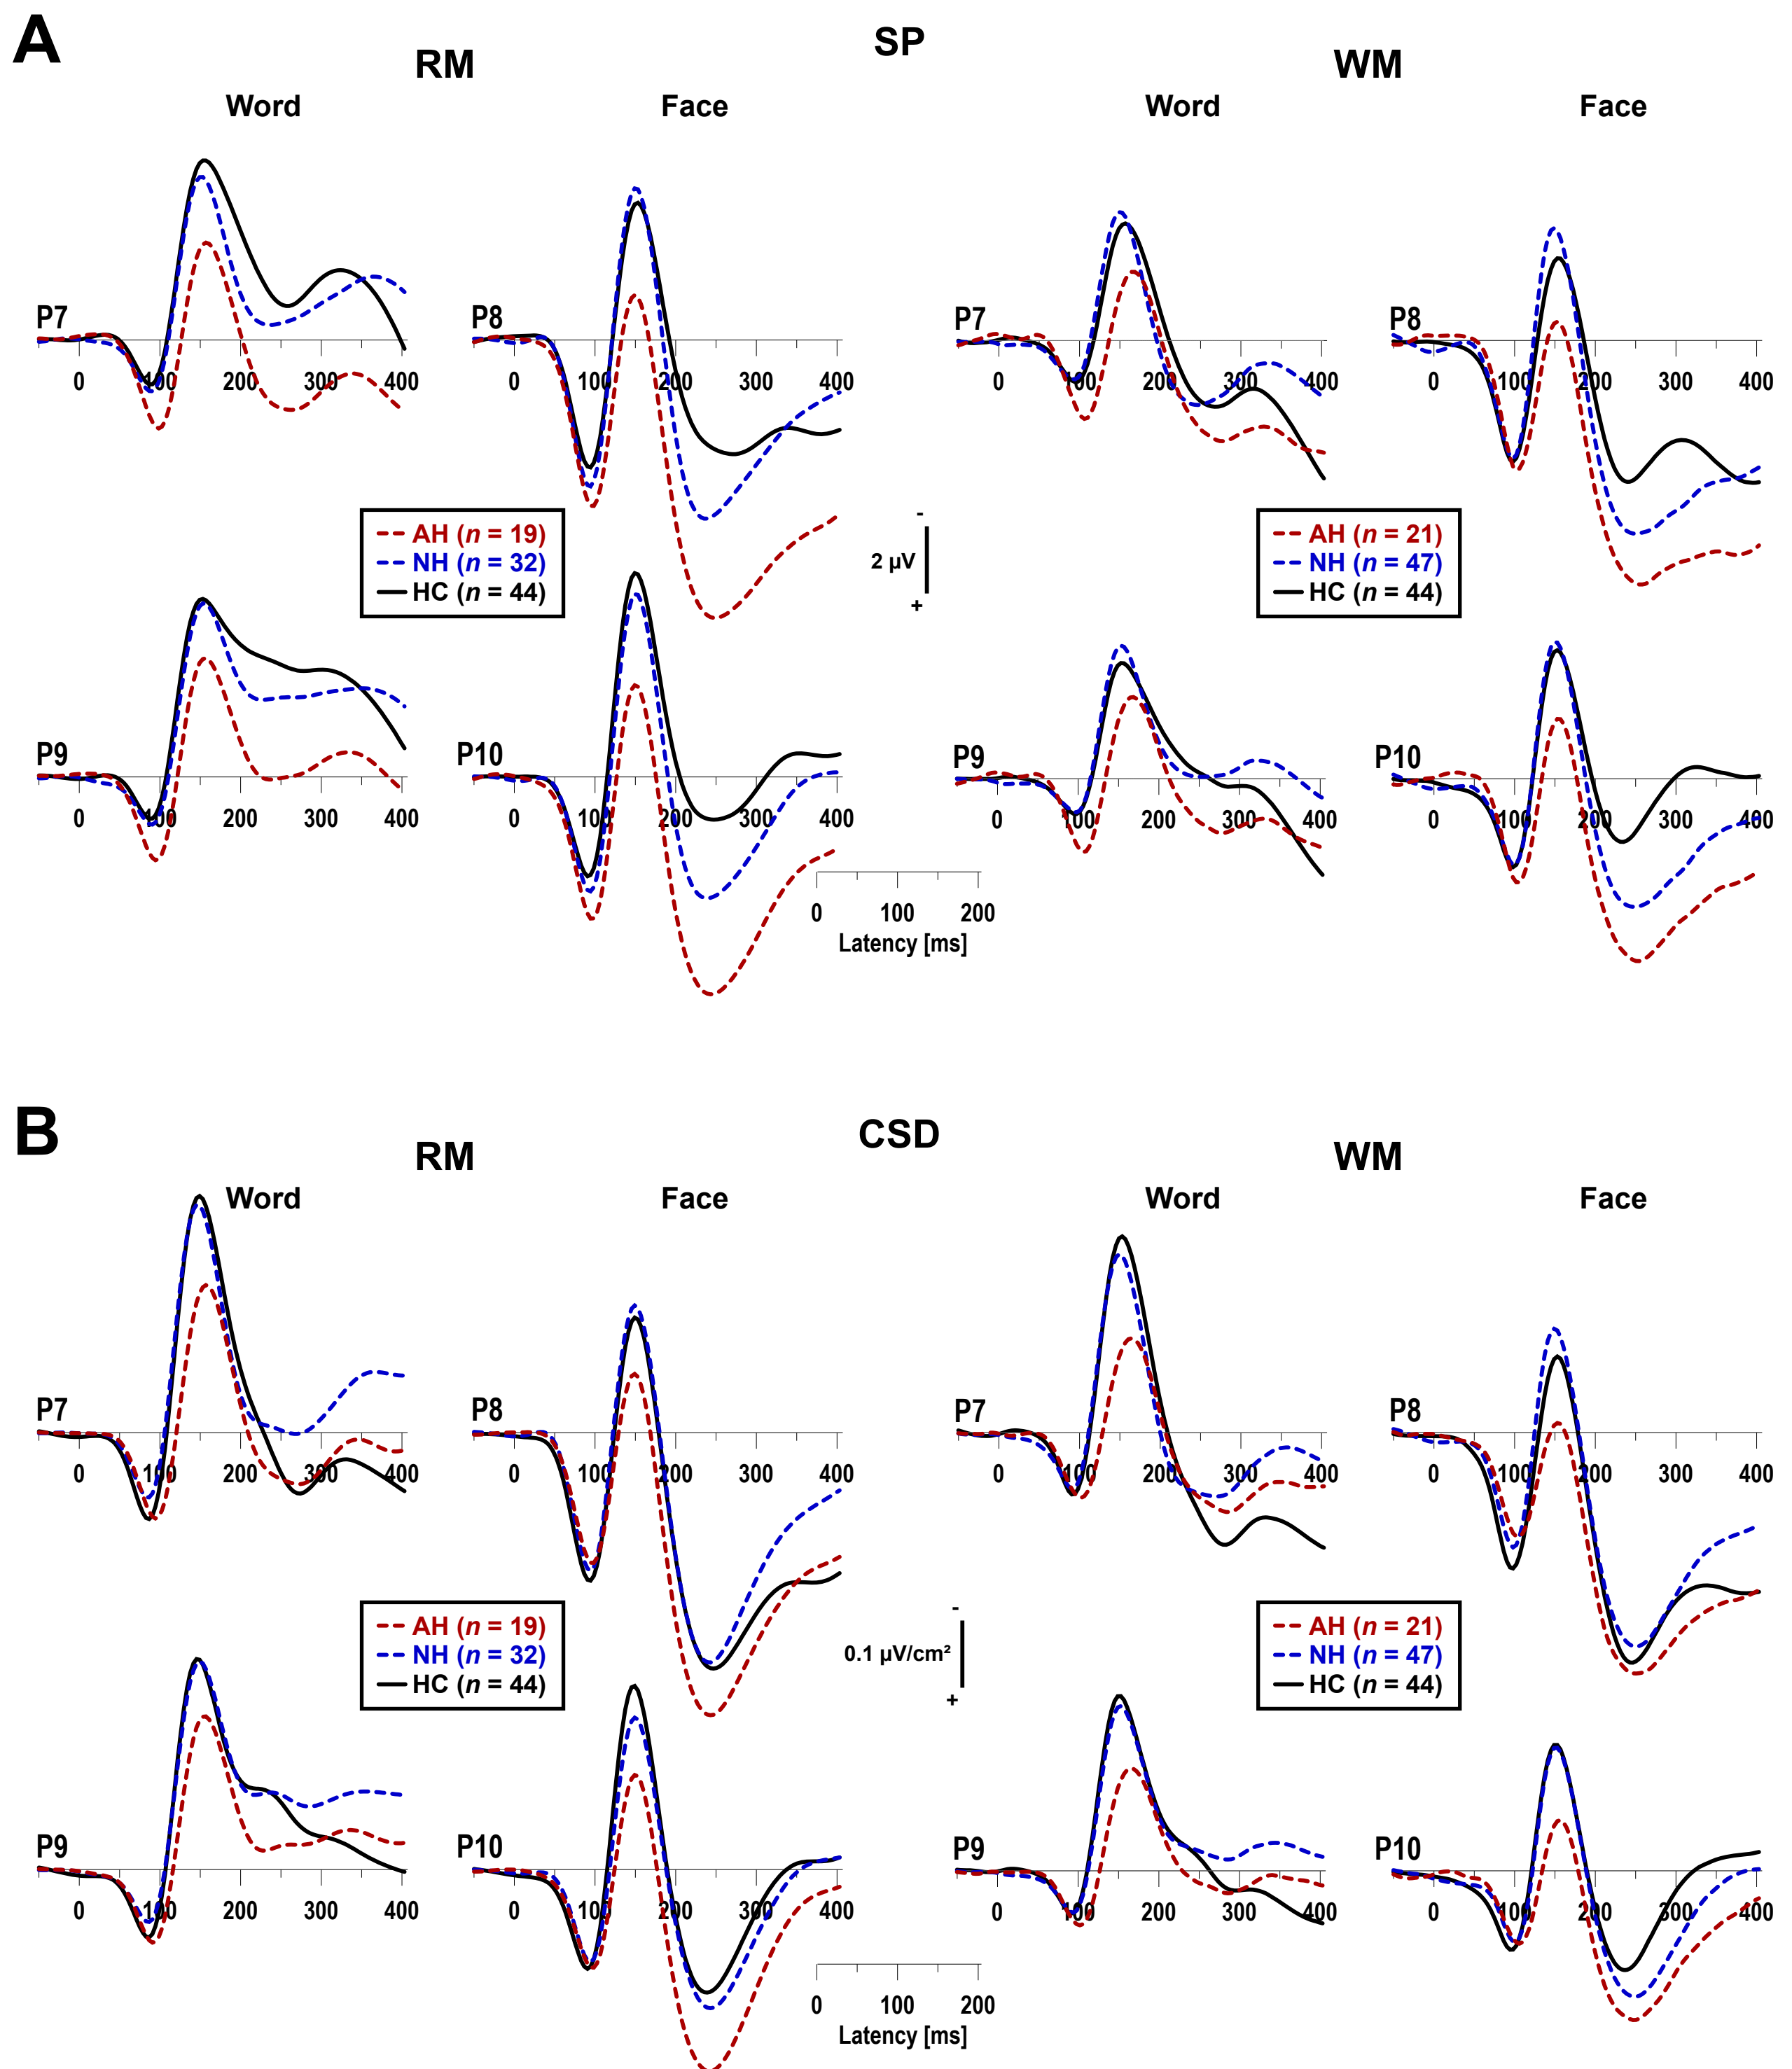

**Figure S1.** Uncorrected (i.e., not adjusted for N1 sink peak latency), grand mean (A) nose-referenced surface potential (SP) [ $\mu$ V] and (B) reference-free current source density (CSD) [ $\mu$ V/cm<sup>2</sup>] waveforms at selected inferior lateral-parietal sites for words (left hemisphere sites P7, P9) and faces (right hemisphere sites P8, P10) for auditory hallucinators (AH), nonhallucinators (NH), and healthy controls (HC) during the recognition memory (RM) and working memory (WM) paradigms using words or faces.
